# Supplementary material
Source: Royal Society of Chemistry journal article supplement (doi:10.1039/d6ay00315j)
Supplement: d6ay00315j1.pdf [file d6ay00315j1.pdf]

## Supplementary Materials

### **Construction of a Mito-targeting fluorescent probe for specific identification of Al<sup>3+</sup> in environmental and biological systems**

Guiying Hu <sup>a,1</sup>, Aoshanshan Fan <sup>b,1</sup>, Yanfei Qin <sup>a</sup>, Wen Qin <sup>a</sup>, Zhiyong Xing <sup>a,\*</sup>,

Liangping Li <sup>c,\*</sup>

<sup>a</sup> School of Medical Technology and Artificial Intelligence, Youjiang Medical University for Nationalities, Baise, Guangxi 533000, China

<sup>b</sup> Leicester International Institute, Dalian University of Technology, Panjin, Liaoning Province 124000, China

<sup>c</sup> School of Pharmacy, Youjiang Medical University for Nationalities, Baise 533000, China

\* Correspondence: zyxing@ymun.edu.cn; 18593232039@163.com

<sup>1</sup> These authors contributed equally to this work

# Contents

|                                                               |    |
|---------------------------------------------------------------|----|
| 1. Materials and apparatus.....                               | 3  |
| 2. Synthetic of HMH-Al .....                                  | 3  |
| 3. Spectral measurement preparation .....                     | 4  |
| 4. Detection of Al <sup>3+</sup> in actual water samples..... | 4  |
| 5. Cytotoxicity of HMH-Al in vitro .....                      | 4  |
| 6. Co-localization experiment .....                           | 4  |
| 7. The test strips of HMH-Al .....                            | 5  |
| 8. Detection of Al <sup>3+</sup> in living cells.....         | 5  |
| 9. Table S1 .....                                             | 6  |
| Fig. S1.....                                                  | 7  |
| Fig. S2.....                                                  | 7  |
| Fig. S3.....                                                  | 8  |
| Fig. S4.....                                                  | 8  |
| Fig. S5.....                                                  | 8  |
| Fig. S6.....                                                  | 9  |
| Fig. S7.....                                                  | 9  |
| Fig. S8.....                                                  | 9  |
| Reference .....                                               | 10 |

## 1. Materials and apparatus

All chemical reagents were procured in their analytical or spectroscopic grade from commercial sources, specifically from Energy Chemical and Aladdin Bio-Chem Technology Co., Ltd., and were utilized directly without further modification. The Bruker AV-600 spectrometer was employed to record the  $^1\text{H}$  NMR and  $^{13}\text{C}$  NMR spectra, utilizing TMS and  $\text{DMSO-}d_6$  as solvents. The chemical structural information of the compound was assessed through ESI-MS and FT-IR spectra, which were acquired using the Waters Xevo UPLC/Xevo G2-XS Q-ToF MS spectrometer and the Bruker SEWERE ALPHA-T, respectively. Absorption and fluorescence spectral data were gathered using the Shimadzu UV-2700 UV-vis spectrometer and the Hitachi FL 4700 fluorescence spectrometer at room temperature.

## 2. Synthetic of HMMH-AI

Compounds 1 and 2 were synthesized according to previously reported literature articles [1].

The intermediate **2** (0.351 mmol) and 4-methoxybenzoyl hydrazine (0.351 mmol) were first dissolved together in 15.0 mL of absolute ethanol [2]. After that, two drops of glacial acetic acid were introduced into the resulting reaction mixture, which was then subjected to stirring at room temperature. Throughout the process, the reaction progress was tracked via thin-layer chromatography (TLC), until the TLC spot corresponding to the starting material was no longer visible. Once the reaction was complete, the mixture was filtered under reduced pressure to collect the light yellow solid product, and the solid was rinsed with ethanol three times, using 5.0 mL of ethanol for each rinse. Yield: 85.9%. m.p.: 255.4-256.2 °C.  $^1\text{H}$  NMR (Fig. S1) (600 MHz,  $\text{DMSO-}d_6$ )  $\delta$  12.10 (s, 1H), 11.46 (s, 1H), 8.78 (s, 1H), 8.13 (d,  $J = 7.9$  Hz, 1H), 8.07 (d,  $J = 8.1$  Hz, 1H), 7.96 (d,  $J = 8.1$  Hz, 3H), 7.68 (d,  $J = 2.0$  Hz, 1H), 7.54 (ddd,  $J = 8.3, 7.1, 1.3$  Hz, 1H), 7.45 (td,  $J = 7.6, 1.2$  Hz, 1H), 7.12 – 7.08 (m, 2H), 3.98 (s, 3H), 3.86 (s, 3H).  $^{13}\text{C}$  NMR (Fig. S2) (151 MHz,  $\text{DMSO-}d_6$ )  $\delta$  167.48, 162.89, 162.72, 154.06, 150.25, 149.04, 146.16, 134.78, 130.14, 127.06, 125.67, 125.31, 124.66, 123.00, 122.70, 120.39, 119.98, 114.32, 111.29, 56.58, 55.96. IR ( $\text{cm}^{-1}$ ) (Fig. S1):  $\nu$  (O–H), 3198;  $\nu$  (C=O), 1643;  $\nu$  (C=N), 1611; 1530, 1506, 1465, 1335, 1312, 1286, 1260, 1189, 1116, 1025. HRMS:  $m/z$  (TOF MS  $\text{ES}^+$ ) (Fig. S3): Calcd. For  $\text{C}_{23}\text{H}_{19}\text{N}_3\text{O}_4\text{S}$ : 433.1096 [**HMMH-AI-H** $^+$ ], found: 432.1023.

### 3. Spectral measurement preparation

The stock solutions of various metal ions  $Zn^{2+}$ ,  $Fe^{3+}$ ,  $Cu^{2+}$ ,  $Cd^{2+}$ ,  $Mn^{2+}$ ,  $K^+$ ,  $Ca^{2+}$ ,  $Co^{2+}$ ,  $Fe^{2+}$ ,  $Na^+$ ,  $Hg^{2+}$ ,  $Mg^{2+}$ ,  $Cr^{3+}$ ,  $Pb^{2+}$ ,  $Ag^+$ ,  $Ni^{2+}$ ,  $Ba^{2+}$  and  $Al^{3+}$  (10 mM) were meticulously prepared by dissolving accurately weighed quantities of the respective components in ultrapure water. The test solution of the probe **HMH-AI**, at a concentration of 1 mM, was diluted in EtOH and further diluted into a mixed solvent consisting of EtOH/H<sub>2</sub>O (v/v, 3/2) to achieve a final concentration of 10  $\mu$ M, intended for the subsequent measurement of fluorescence and UV-vis spectra.

### 4. Detection of $Al^{3+}$ in actual water samples

Detections of  $Al^{3+}$  was performed on three real samples: ultrapure water, tap water, Youjiang River water, the Youjiang River water was treated with simple decompression filtration [3]. Varying concentrations of  $Al^{3+}$  (2, 4, 6, 8, and 10  $\mu$ M) were prepared using each of the water samples and introduced into the solution of probe **HMH-AI**, with the fluorescence intensity at 485 nm being recorded for each system, and the recovery rates were computed in the end.

### 5. The test strips of **HMH-AI**

The discs of the same size test paper were soaked in probe **HMH-AI** (10  $\mu$ M) solution for 30 min and removed to air dry [4]. Then these paper strips were treated with  $Al^{3+}$  prepared in pure aqueous media. The differences were observed under a 365 nm UV lamp.

### 6. Cytotoxicity of **HMH-AI** in vitro

HeLa cells were purchased from Wuhan Proceed Life Technology Co., Ltd. (China). The cells were cultured in DMEM (Dulbecco's modified Eagle's medium) containing 1% antibiotics (100 U/mL penicillin and 100  $\mu$ g/mL streptomycin) and 10% FBS (fetal bovine serum) in an atmosphere of 37°C and 5% CO<sub>2</sub>. When the cell density reached 90% of confluence, a subculture was done and the medium was changed approximately every day. The cytotoxicity of **HMH-AI** was evaluated by CCK-8 counterstaining assay done by using commercial kits purchased from Beyotime (Nantong, China).

### 7. Co-localization experiments

HeLa cells to grow and adhere for 24 h in a constant temperature incubator, probe **HMH-AI** (10  $\mu$ M) was added and incubated for 0.5 h. Subsequently, commercial subcellular fluorescent

biosensors Mito-Tracker Green (200 nM), Lyso-Tracker Green (100 nM) and LD-Tracker Green (1  $\mu$ M) were added and co-incubated for 0.5 h. After incubation, the medium was removed, and the cells were washed three times with PBS. The cells were then fixed with 4% paraformaldehyde solution at room temperature for 15-20 min. Finally, the confocal dishes were placed under a confocal microscope for fluorescence imaging. Co-localization experiments were performed on a confocal laser scanning microscope. Channel of probe **HMH-AI**, green channel:  $\lambda_{\text{ex}} = 405$  nm;  $\lambda_{\text{em}} = 450-500$  nm; Mito-Tracker Green:  $\lambda_{\text{ex}} = 488$  nm,  $\lambda_{\text{em}} = 500-550$  nm; Channel of Lyso-Tracker Green:  $\lambda_{\text{ex}} = 488$  nm,  $\lambda_{\text{em}} = 500-550$  nm; Channel of LD-Tracker (BODIPY 493/503) Green:  $\lambda_{\text{ex}} = 488$  nm,  $\lambda_{\text{em}} = 500-550$  nm.

## 8. Detection of $\text{Al}^{3+}$ in living A549 and HeLa cells

The A549/HeLa cells were obtained from iCell Bioscience Inc, Shanghai. The cells were divided into three groups as control, probe **HMH-AI**, **HMH-AI**+ $\text{Al}^{3+}$ . All groups were added 1 mL of PBS to wash twice, then added 1 mL of serum-free medium, incubated for 1 h [5]. After that, the medium was sucked off, and 1 mL serum-free medium containing (20, 40  $\mu$ M)  $\text{Al}^{3+}$  ions was added according to the experimental group, respectively. After incubation for 1 h, the culture solution was removed, the cells were washed with PBS for three times, then added and cultured for 1 h with 4% paraformaldehyde (1 mL/dish), which was freshly prepared and fixed at room temperature. After 3 times washing with PBS, 1 mL probe solution (20  $\mu$ M) was added and the cells were incubated for 30 min, then washed with PBS for 3 times.

**Table S1**

Comparison between the performance of **HMH-AI** with recent benzothiazole or Schiff-base probes

| Ref.      | Probes                                                                              | Analyte          | Test Medium                         | LOD          | Application                                  |
|-----------|-------------------------------------------------------------------------------------|------------------|-------------------------------------|--------------|----------------------------------------------|
| This Work | 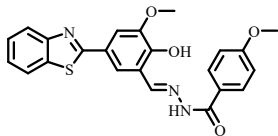 | $\text{Al}^{3+}$ | EtOH/ $\text{H}_2\text{O}$<br>(3/2) | 0.28 $\mu$ M | Water samples<br>Cell imaging<br>Test strips |
| 6         |  | $\text{Al}^{3+}$ | DMF/ $\text{H}_2\text{O}$<br>(9:1)  | 0.49 $\mu$ M | Test strips                                  |

|    |                                                                                     |                  |                                     |             |                                                   |
|----|-------------------------------------------------------------------------------------|------------------|-------------------------------------|-------------|---------------------------------------------------|
| 7  | 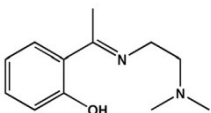   | Al <sup>3+</sup> | EtOH/H <sub>2</sub> O<br>(9/1)      | 4.32 μM     | DFT                                               |
| 8  |    | Al <sup>3+</sup> | DMSO/H <sub>2</sub> O<br>(1:9, v/v) | 2.85 μM     | logic gate<br>Cell imaging                        |
| 9  |    | Al <sup>3+</sup> | DMF/H <sub>2</sub> O<br>(2: 3)      | 1.51 μM     | Cell imaging<br>Test strips                       |
| 10 |    | Al <sup>3+</sup> | DMSO/H <sub>2</sub> O (9:1)         | 0.22 μM     | Water sample                                      |
| 11 |    | Al <sup>3+</sup> | EtOH                                | 4.08 nM     | Cell imaging                                      |
| 12 |  | Al <sup>3+</sup> | DMF/H <sub>2</sub> O (1:9)          | -           | live cells<br>AD rat model                        |
| 13 |  | Al <sup>3+</sup> | DMF/H <sub>2</sub> O<br>(6:4)       | 58.5 nM     | Zebrafish<br>imaging<br>Living mice               |
| 14 |  | Al <sup>3+</sup> | DMSO/H <sub>2</sub> O (7/3)         | 10.98<br>nM | Cell imaging<br>Zebrafish<br>imaging              |
| 15 |  | Al <sup>3+</sup> | DMSO                                | 25 nM       | Zebrafish<br>imaging<br>water and drug<br>samples |

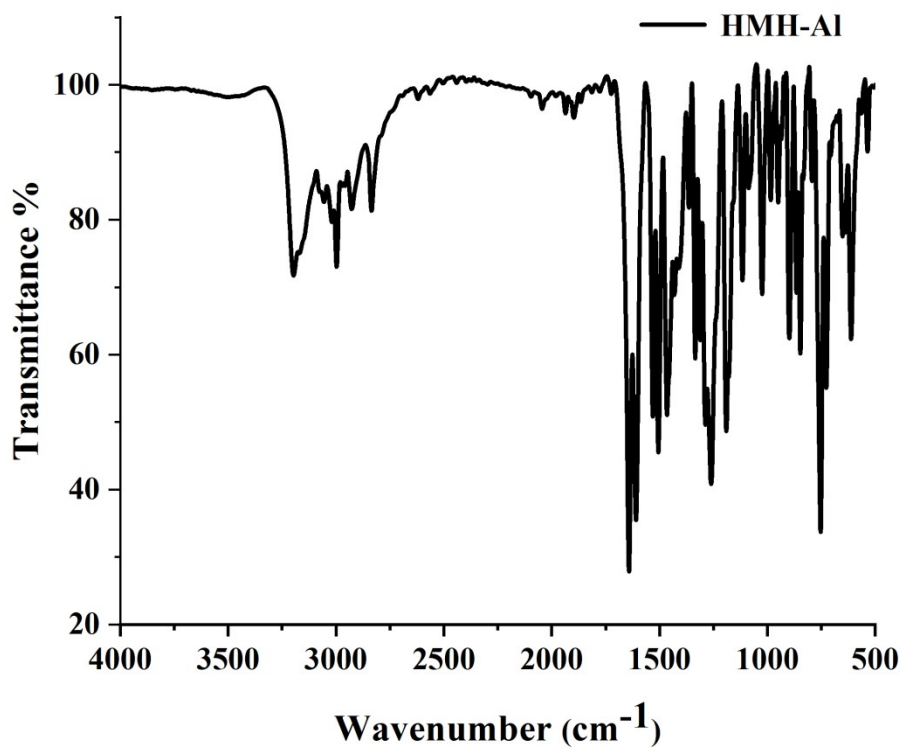

Fig. S1 IR of target product probe HMH-AI.

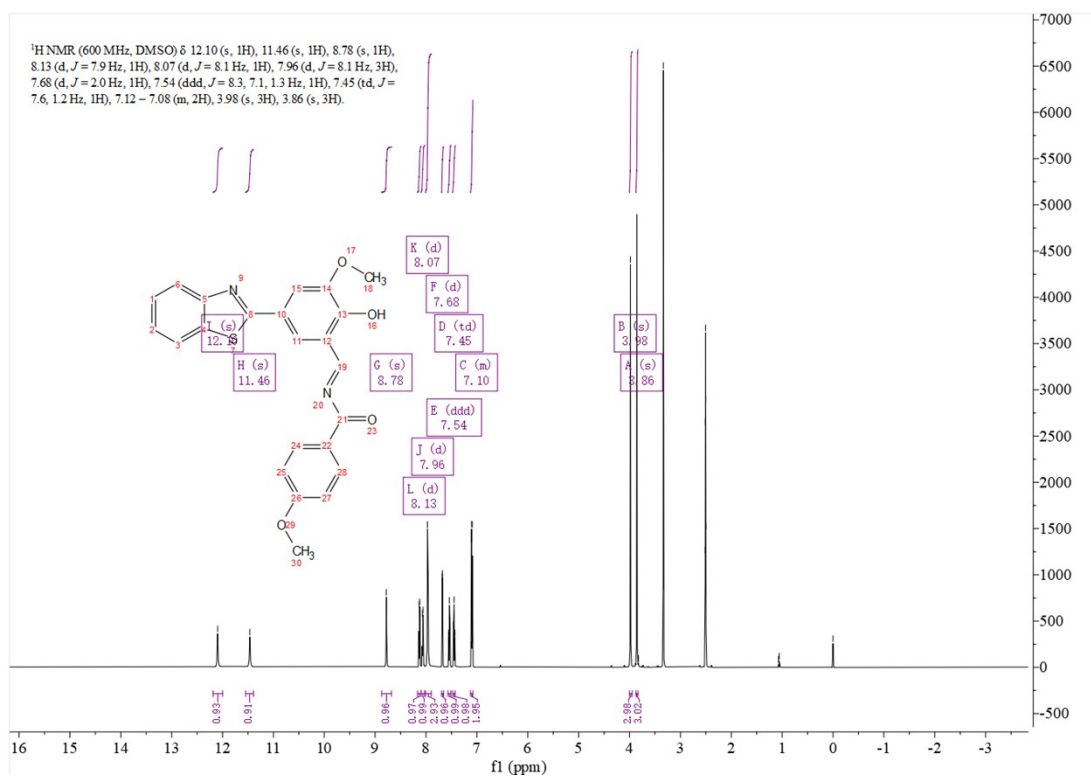

Fig. S2 <sup>1</sup>H NMR of target product probe HMH-AI.

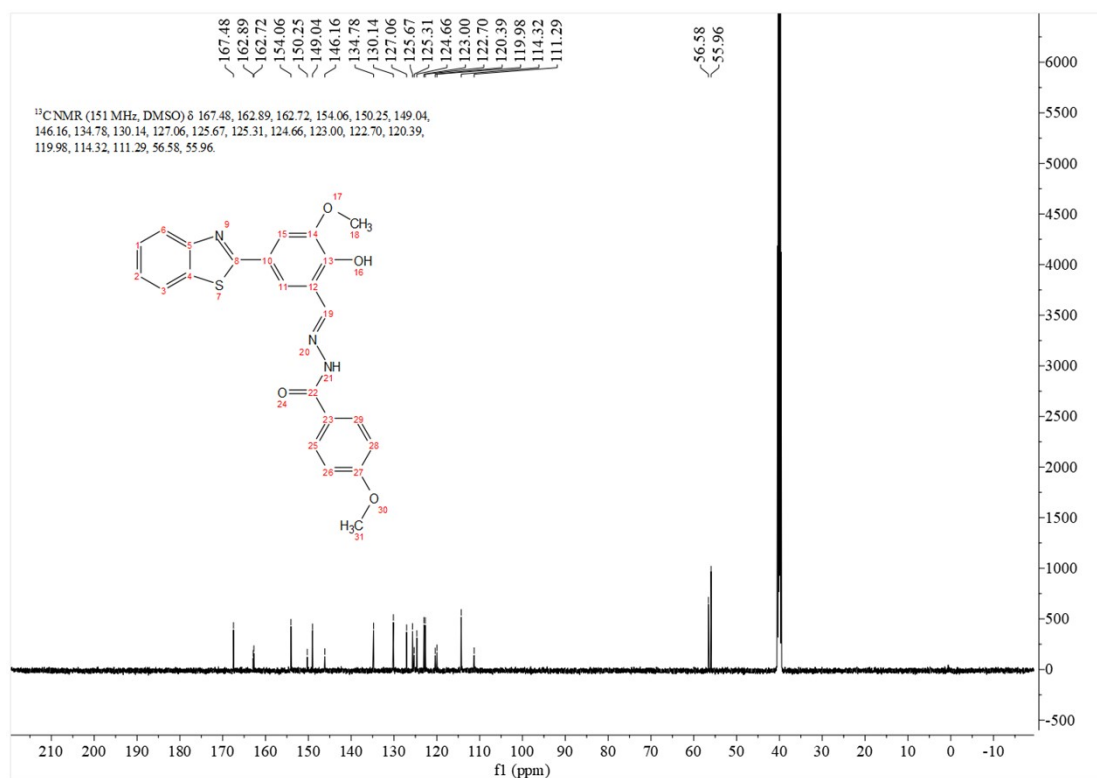

Fig. S3 <sup>13</sup>C NMR of target product probe HMH-AI.

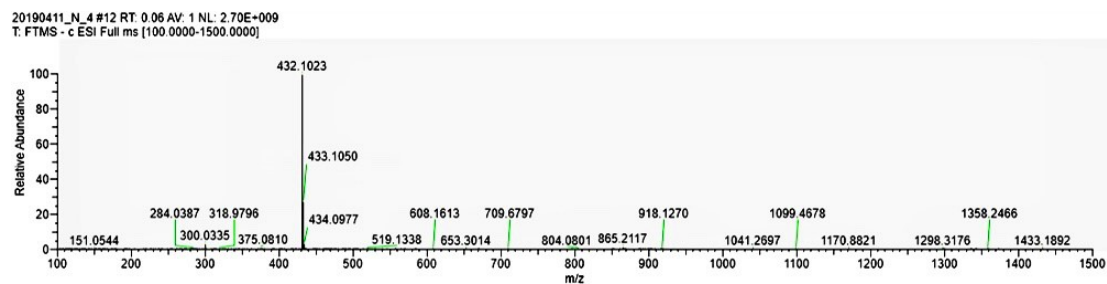

Fig. S4 HRMS of probe HMH-AI.

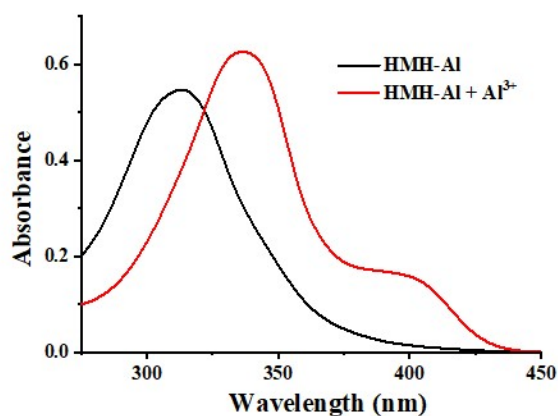

Fig. S5 UV-vis absorbance spectral change of HMH-AI (10 μM) and HMH-AI/Al<sup>3+</sup>.

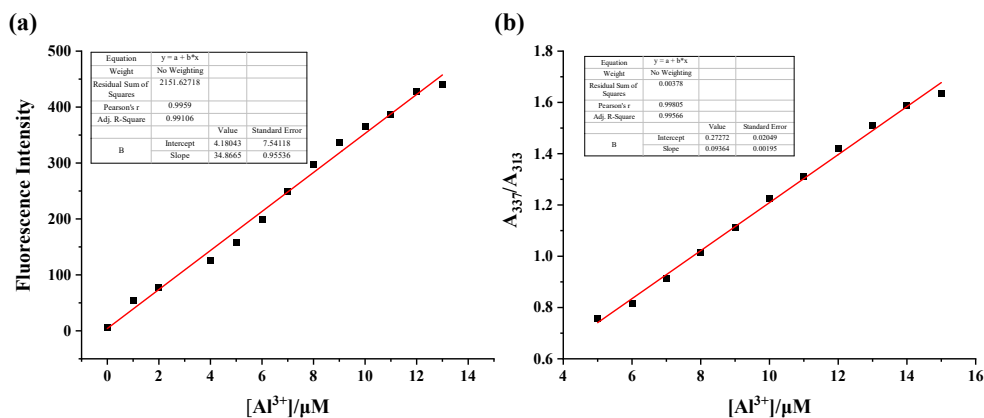

**Fig. S6** (a) Fluorescence intensity at 485 nm as a function of  $\text{Al}^{3+}$  concentrations (0-13  $\mu\text{M}$ ) (b) Absorbance intensity at 337 nm/313 nm as a function of  $\text{Al}^{3+}$  concentrations (0.5-15  $\mu\text{M}$ )

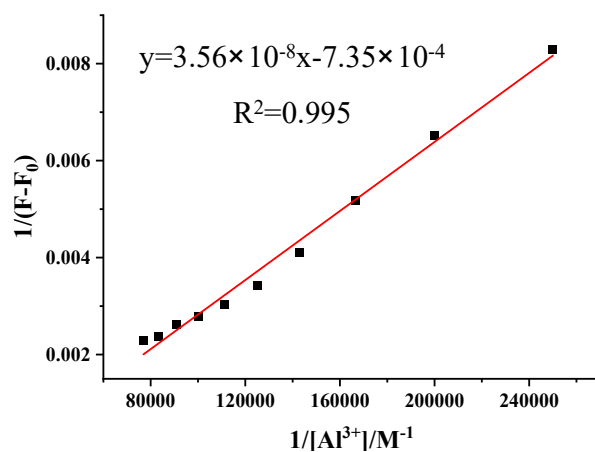

**Fig. S7** Benesi-Hildebrand plot of probe **HMH-Al** with  $\text{Al}^{3+}$ .

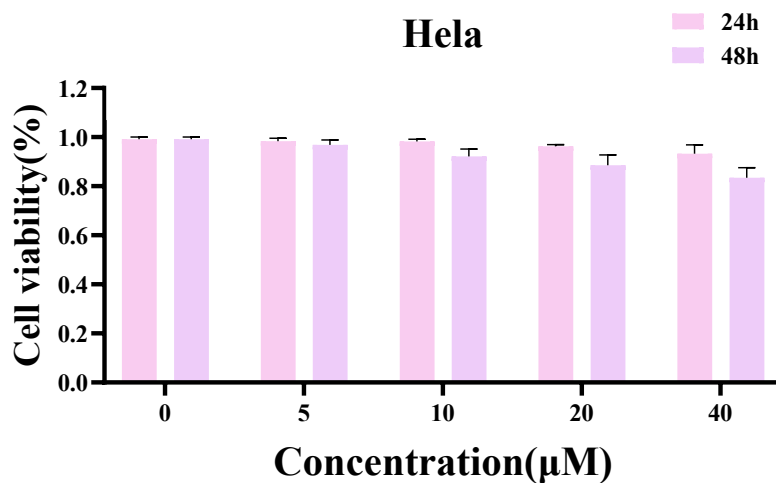

**Fig. S8** CCK-8 assay for detecting the effect of different concentrations of **HMH-Al** on cell survival rate.

## Reference

- [1] S. Zeng, S.-J. Li, T.-T. Liu, X.-J. Sun, Z.-Y. Xing, A significant fluorescent “turn-on” chemosensor for Al<sup>3+</sup> detection and application in real sample, logic gate and bioimaging, *Inorganica Chimica Acta*. 495 (2019). <https://doi.org/10.1016/j.ica.2019.118962>.
- [2] Y.-T. Liu, Q.-Q. Zhang, S.-Y. Yao, Z.-B. Jiang, H. Wang, Y.-L. Zou, L.-X. Zhao, Unique isophorone-based NIR fluorescent probe with a high fluorescence quantum yield and larger Stokes shift for Al<sup>3+</sup> and Zn<sup>2+</sup> level simultaneous monitoring in biological system, *Spectrochimica Acta Part A: Molecular and Biomolecular Spectroscopy*. 335 (2025). <https://doi.org/10.1016/j.saa.2025.126001>.
- [3] B. Li, F. Ma, Y. Li, T. Hu, Q. Niu, J. Chen, A new D- $\pi$ -A-type fluorescent probe for sensitive and quantitative monitoring and bioimaging of N<sub>2</sub>H<sub>4</sub> in various water/soil samples, living cells, plants and zebrafish, *Spectrochimica Acta Part A: Molecular and Biomolecular Spectroscopy*. 345(2026), <https://doi.org/10.1016/j.saa.2025.126814>.
- [4] J. Hu, X. Zhao, G. Zhang, Z. Cui, C. Wang, Synthesis of a “turn-on” fluorescent polymer probe, preparation and reusability of its test paper on metal ions detection, *Journal of the Taiwan Institute of Chemical Engineers*. 142 (2023). <https://doi.org/10.1016/j.jtice.2022.104630>.
- [5] S. Alam, L. Lu, Y. Mao, H. Lu, H. Sun, C. Jiang, Development of Dicyanoisophorone-based fluorescent probes for hydrogen sulfide sensing in live cells and water samples, *Polyhedron*. 281 (2025). <https://doi.org/10.1016/j.poly.2025.117750>.
- [6] Mondal, A.; Ahmmed, E.; Chakraborty, S.; Sarkar, A.; Lohar, S.; Chattopadhyay, P. Aggregation Induced Emission Enhancement (AIEE) of Naphthalene-Appended Organic Moiety: An Al<sup>3+</sup> Ion Selective Turn-On Fluorescent Probe. *Chemistryselect* 2020, 5, 147–155. <https://doi.org/10.1002/slct.201903645>.
- [7] Maity, D.; Dey, S.; Roy, P. A two-pocket Schiff-base molecule as a chemosensor for Al<sup>3+</sup>. *New J. Chem.* 2017, 41, 10677–10685. <https://doi.org/10.1039/C7NJ02067H>.
- [8] Ren, Y.P.; Han, J.; Wang, Y.; Tang, X.; Wang, L.; Ni, L. An OFF-ON-OFF type fluorescent probe based on a naphthalene derivative for Al<sup>3+</sup> and F<sup>-</sup> ions and its biological application. *Luminescence* 2018, 33, 15–21. <https://doi.org/10.1002/bio.3366>.

- [9] N.-N. Li, W.-Y. Lin, Y.-T. Wei, et al., (2024) Development of an AIE-active fluorescent probe for the simultaneous detection of  $\text{Al}^{3+}$  and viscosity and imaging in Alzheimer's disease model, *Bioorganic Chemistry* 152: 107768. <https://doi.org/10.1016/j.bioorg.2024.107768>.
- [10] M. Kumar, A. Kumar, M. S. H. Faizi, S. Kumar, M. K. Singh, S. K. Sahu, S. Kishor and R. P. John, A selective 'turn-on' fluorescent chemosensor for detection of  $\text{Al}^{3+}$  in aqueous medium: Experimental and theoretical studies, *Sensors and Actuators B: Chemical*, 2018, 260, 888-899, <https://doi.org/10.1016/j.snb.2018.01.098>.
- [11] Y.-Q. Xie, M.-M. Han, Y.-M. Zhang, H. Chen, H.-B. Zhang, C.-Y. Ren, L. Li, R. Wu, H. Yao, X.-N. Shi, Q. Lin and T.-B. Wei, A novel fluorescent probe with high sensitivity for sequential detection of  $\text{CN}^-$  and  $\text{Al}^{3+}$  in highly aqueous medium and its applications in living cell bioimaging, *Journal of Photochemistry and Photobiology A: Chemistry*, 2023, 437, <https://doi.org/10.1016/j.jphotochem.2022.114488>.
- [12] Q. Liu, Y. Liu, Z. Xing, Y. Huang, L. Ling and X. Mo, A novel dual-function probe for fluorescent turn-on recognition and differentiation of  $\text{Al}^{3+}$  and  $\text{Ga}^{3+}$  and its application, *Spectrochimica Acta Part A: Molecular and Biomolecular Spectroscopy*, 2023, 287, <https://doi.org/10.1016/j.saa.2022.122076>.
- [13] Y.-T. Liu, Y. Hou, S.-Y. Yao, et al., (2025) A novel dual-responsive NIR fluorescent probe based on isophorone: Real-time detection of  $\text{Al}^{3+}$ , *Journal of Environmental Chemical Engineering*. 13: 115620. <https://doi.org/10.1016/j.jece.2025.115620>.
- [14] A. A. Mujthaba, K. R. Selva, L. K. Shaji, et al, (2024) A dual responsive novel bipyridyl carbohydrazide Schiff base as a colorimetric-fluorescent probe for  $\text{In}^{3+}$  and  $\text{Al}^{3+}$  ions and its potential applications, *Sensors & Diagnostics* 3: 455-467. <https://doi.org/10.1039/D3SD00282A>
- [15] R. Bhaskar, P. Somkuwar, M. Babu, et al., (2025) A tris-buffer appended Schiff base as a fluorescent probe for  $\text{Al}^{3+}$  and its potential application in Zebrafish imaging, *Synthetic Metals* 3: 12117870. <https://doi.org/10.1016/j.synthmet.2025.117870>.
